# Supplementary material
Source: MDPI journal article supplement (https://www.mdpi.com/2073-4441/10/12/1799)
Supplement: s1 [file s1]

## Sheet: Sheet1
Sample	Source	PH	Temp	EC	Na	K	Mg	Ca	Cl	SO4	HCO3	NO3	F	SiO2	Na/Ca	δ18O	δD	S.I calcite	S.I fluorite
Code	type		⁰C	µS/cm	mg/L	mg/L	mg/L	mg/L	mg/L	mg/L	mg/L	mg/L	mg/L	mg/L
B1	Shallow well	5.6	26	318	16	4.1	11.4	19	33.7	0.39	26.8	69.5	0.5	31.8741	0.8	-3.4	-4.2	-3.87	-2.12
B2		6.63	21.8	325	25.5	7.3	5.5	19	6.4	1	128.8	7.3	0.6	33.7566	1.3	-1.12	5.34	-1.41	-1.87
B3		6.25	22.2	312	26.5	7.2	8.7	16	9.1	9.3	120.8	17.2	0.6	37.0082	1.7	-1.79	2.4	-1.9	-1.97
B4		7.047	22.4	536	38.2	12.3	9.9	35.3	2.3	1.5	561.9	n.a.	1.3	n.a.	1.1	-2.03	-1.04	-0.16	-1.05
B5		6.738	24.6	633	28.3	16.7	10.1	48.3	35.1	74.9	577.1	4	n.a.	54.5521	0.6	-2.04	-1.56
B6		7.04	25.1	197	27	6.9	4.1	11.4		0.1	128.1	2.1	0.9	34.7192	2.4	-2.01	-4.3	-1.17	-1.76
B7	Deep well	6.45	24	265	21.5	9.6	9.1	22.8	6.4	0.6	161	7.4	0.5	n.a.	0.9	-2.6	-3.51	-1.4	-2
B8		6.07	27	246	7	4.3	7.2	28	8.5	0.7	139.1	4.8	0.7	47.2763	0.3	-2.45	-3.26	-1.7	-1.64
B9		6.72	23.9	510	24	16	13.4	61.6	1.9	1	312.9	0.3	2.2	56.4749	0.4	-2.57	-7.3	-0.49	-0.35
B10		6.92	24	569	48	9.5	20.5	32.7	3.6	1	322.1	2.2	1.7	59.4698	1.5	-3.14	-8.49	-0.53	-0.86
B11		6.91	24.2	494	54.5	19	6.7	40	2.8	0.4	301.3	0.3	2.9	n.a.	1.4	-4.12	-19.23	-0.48	-0.28
B12		7.3	25.5	673	106	13	7.2	28	5.7	4.9	396.4	1.8	3.1	61.5662	3.8	-4.29	-22.75	-0.12	-0.42
B13		7.05	24.3	304	18.5	8.1	8.7	19.8	5.5	0.8	136.9	5.1	0.7	50.0787	0.9	-3.43	-12.47	-0.92	-1.76
B14		7.7	24	460	62.6	12	12	24	1.2	0	292.8	17.6	1.7	64.6252	2.6	-2.31	-3.12	0.08	-0.97
B15		7.6	26.2	470	73	12.3	9.7	24	11	0	293	4	2.2	61.0314	3	-2.35	-2.96	0.02	-0.77
B16		7.3	25.3	232	53.7	4.6	4.8	8	1.8	4	146.4	0.3	2.5	63.8765	6.7	-3.75	-17.67	-1.02	-1.05
B17		6.826	27.5	267	21.2	9.6	4.1	14.7	1.9	0.4	170.8	4.9	0.9	66.9601	1.4	-2.12	-3.21	-1.12	-1.7
B18		7.331	21.9	644	47	15.4	12.3	33.4	3.4	n.a.	622.6	3.4	1.5	58.8308	1.4	-2.23	-2.69	0.08	-0.96
B19		8.167	22.2	336	31	7.9	10.8	12.6	1.9	1.7	315.2	0.2	0.8	n.a.	2.5	-3.24	-11.01	0.28	-1.87
B20		7.544	31.4	436	41.8	9.4	6.3	18.3	3.1	1.2	372.1	n.a.	2.4	65.6765	2.3	-3.39	-12.37	0.03	-0.85
B21		7.686	29.5	667	56	14.7	3.5	20.1	5.1	6	558.1	n.a.	3	73.1641	2.8	-4.52	-24.8	0.37	-0.67
B22		7.606	24.7	770	61.6	17.9	0.9	14.6	14.2	16.6	622.6	10.3	4.6	77.0148	4.2	-4.29	-22.75	0.07	-0.37
B23		7.403	37	719	58.7	14.8	3.7	19.5	8.6	9.5	558.1	1	4.9	74.0198	3	-4.48	-24.36	0.11	-0.32
B24		7.411	27.7	512	43.7	12.7	9.3	20.3	7.8	7.9	486	1.2	1.9	68.7325	2.1	-2.9	-11.21	-0.03	-1.01
B25		7.682	23.7	496	45.5	13.1	4.8	20.5	4.8	3.4	413.8	0.4	2.8	67.0211	2.2	-3.82	-17.71	0.14	-0.6
B26		7.218	25.4	306	24.9	7.7	6.7	11.9	2.1	1.4	284.7	0.7	1	62.4676	2.1	-3.33	-11.61	-0.65	-1.7
B27		7.7776	27.5	662	57.1	12.3	3.9	15.6	4.5	5.8	459.4	n.a.	4.2	65.8904	3.7	-4.25	-22.53	0.19	-0.42
B28		7.702	40.6	716	62	12.4	0.6	8.7	15.3	16.4	501.2	7.4	5.1	69.7412	7.1	-4.9	-27.08	0.06	-0.66
B29		7.881	34.3	536	52.7	12.4	2	9.4	5.8	3.3	394.8	0.7	5.6	65.8904	5.6	-4.11	-20.02	0.12	-0.45
B30	Cold spring	6.5	22.3	112	7.1	4	2.7	6.1	3.6	1.4	40.3	4.2	0.5	34.7192	1.2	-3.22	-9.65	-2.48	-2.46
B31		6.1	20.1	124	17	6.1	1	4.8	3.8	1	58	5.5	0.7	33.3929	3.5	-2.62	-4.9	-2.86	-2.25
B32		6.301	22.5	198	23.3	10.7	1.4	4.8	6.2	2.2	117.7	23.2	0.5	n.a.	4.8	-2.05	-2.35	-2.36	-2.62
B33	Hot spring	6.478	32.8	202	27.2	6.6	1.4	4.9	1.8	0.5	178.4	2.4	1.7	70.169	5.6	-2.39	-4.07	-1.82	-1.66
B34		7.62	37.3	986	194.1	22.4	4.1	18.4	18.4	25.1	747.9	8.9	11.9	67.174	10.5	-3.18	-12.73	0.35	0.34
B35		7.85	41	911	67.1	17.5	2.4	9.9	28.6	8.2	698.6	n.a.	9.7	68.8855	6.8	-1.96	-4.82	0.37	-0.1
B36		8.508	81	1262	197.7	39.7	0.3	3.5	64	106	703.3	n.a.	57.4	n.a.	56.6	-2.83	-11.11	0.7	0.33
B37	River	7.43	24	219	17	7.2	6.4	12.2	3.6	12.8	93.9	2.1	0.6	n.a.	1.4	-2.93	-3.73
B38		7.727	23	83.2	17.2	10.3	3.1	18.7	8.2	4.9	86.3	15.6	1.9	n.a.	0.9	-2.12	-4.9
B39	Lake	9.68	25.3	7240	2100	91	0.5	7.2	270.7	1.1	4114	1.2	58.5	n.a.	291.7	7.21	38.92
B40		9.85	27.3	13660	3800	111	0.5	2.4	336.9	8	3036	1.6	112	n.a.	1583.3	7.99	43.29
B41		10.1	27.8	26300	4250	282	2.9	17.6	611.4	652.5	1254	2.7	29.9	n.a.	241.5	7.89	51.09
B42		6.97	23.6	187	15	23	4.3	7.2	11.4	11.6	37.1	42	0.2	n.a.	2.1	3.88	28.81
		Note= n.a means not analysed
